# Supplementary material for: Dysfunction of exhausted T cells is enforced by MCT11-mediated lactate metabolism
Source: PubMed Central journal article supplement (PMC11588660; doi:10.1038/s41590-024-01999-3), 2024-11-08

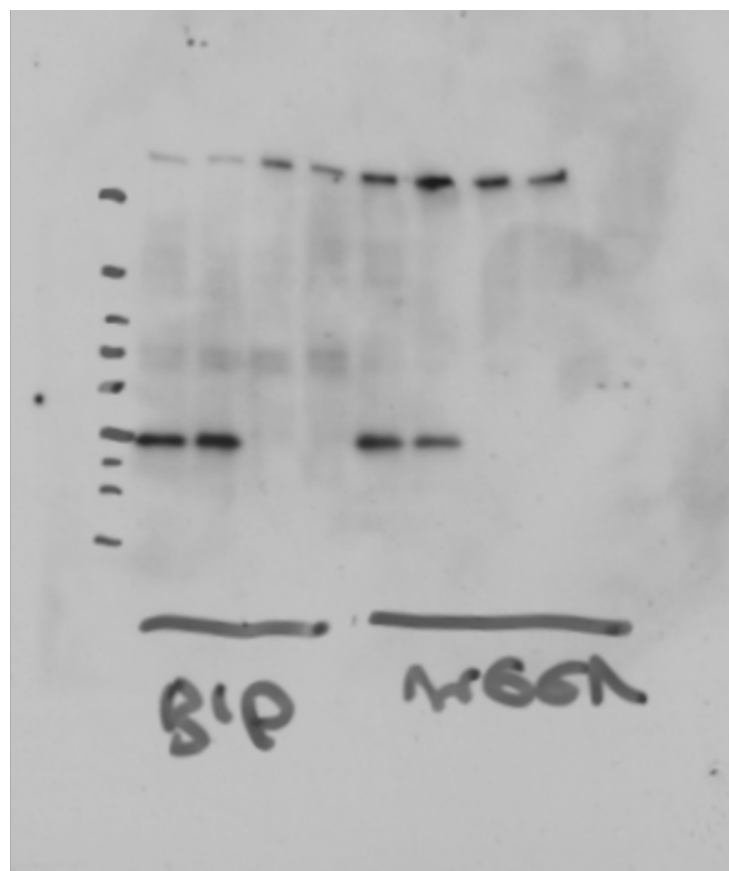

Supplement: 41590_2024_1999_MOESM15_ESM.pdf [file 41590_2024_1999_MOESM15_ESM.pdf]
